# Supplementary material for: Long-term presence of angiotensin II type 1 receptor autoantibody reduces aldosterone production by triggering Ca2+ overload in H295R cells
Source: Springer Nature journal article supplement (doi:10.1007/s12026-017-8963-6), 2017-11-16

**Supplemental methods:**

**Total RNA isolation and QPCR**

H295R cells cultured in 35 mm culture dish were treated with AT1-AA or AT1-AA+ Gö 6983 or AT1-AA+ Nifedipine or vehicle. Total RNA was extracted after 48 hours of treatment (Trizol reagent, T9424, Sigma). The cDNA was synthesized by oligo (dT) (SuperScript™ III Reverse Transcriptase, 18080044, Thermo Fisher). The primer sequences used in our study were: CYP11B1 forward 5’- ACTAGGGCCCATTTTCAGGT-3’, reverse 5’-GGCAGCATCACACACACC-3’; CYP11B2 forward 5’- GCACCTGCACCTGGAGATG-3’, reverse 5’- CACACACCATGCGTGGTCC-3’; beta-actin forward 5’- CCAACCGCGAGAAGATGA-3’, reverse 5’- CCAGAGGCGTACAGGGA TAG-3’. PKC α forward 5’-AGAAGGACATATCAAAATTG-3’, reverse 5’-AGGCCCACCAGTCCACAGAT-3’. Real-time PCR was performed using SYBR® Fast qPCR Mix (RR430A, Takara). The relative gene expression was calculated by using the ΔΔCt method. Beta-actin was used as an endogenous control gene.

**Supplemental data:**

**Figure S1: The whole membrane result of CYP11B2 expression.** In order to confirm the specific bands of CYP11B2, two antibodies bought from different companies (BIOSS and Santa Cruz) were used.


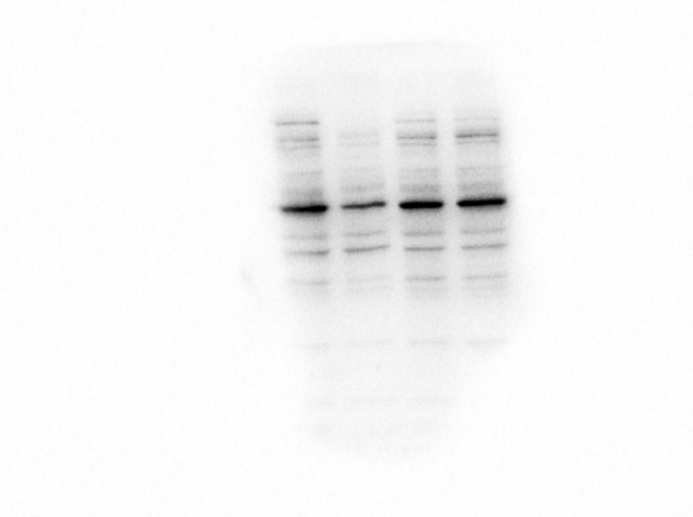


1 2 3 4

58 kDa

**1= vehicle;**

**2= AT1-AA;**

**3= AT1-AA+ Gö 6983**

**4= AT1-AA+ Nifedipine**


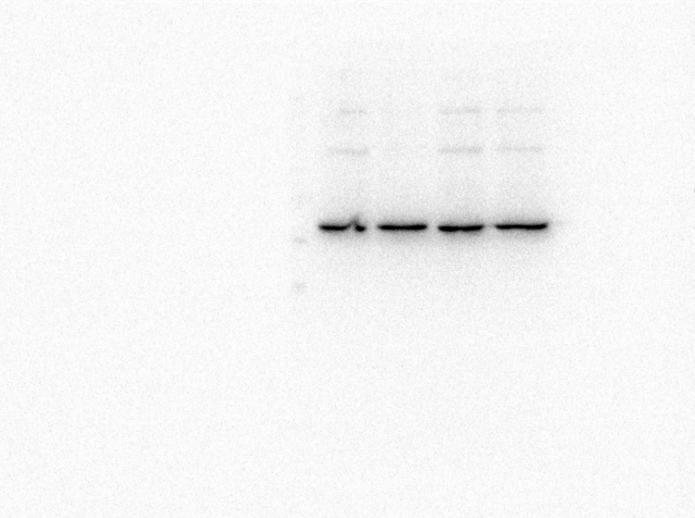


1 2 3 4

42 kDa

**1= vehicle;**

**2= AT1-AA;**

**3= AT1-AA+ Gö 6983**

**4= AT1-AA+ Nifedipine**

**Figure S2: Real time quantitative PCR (qPCR) analysis of CYP11B1, CYP11B2, and PKC.** The relative gene expression was calculated by using the ΔΔCt method. Beta-actin was used as an endogenous control gene. The data represent three independent experiments. **P*<0.05 *vs.* vehicle group, # *p*<0.05 *vs.* AT1-AA group.


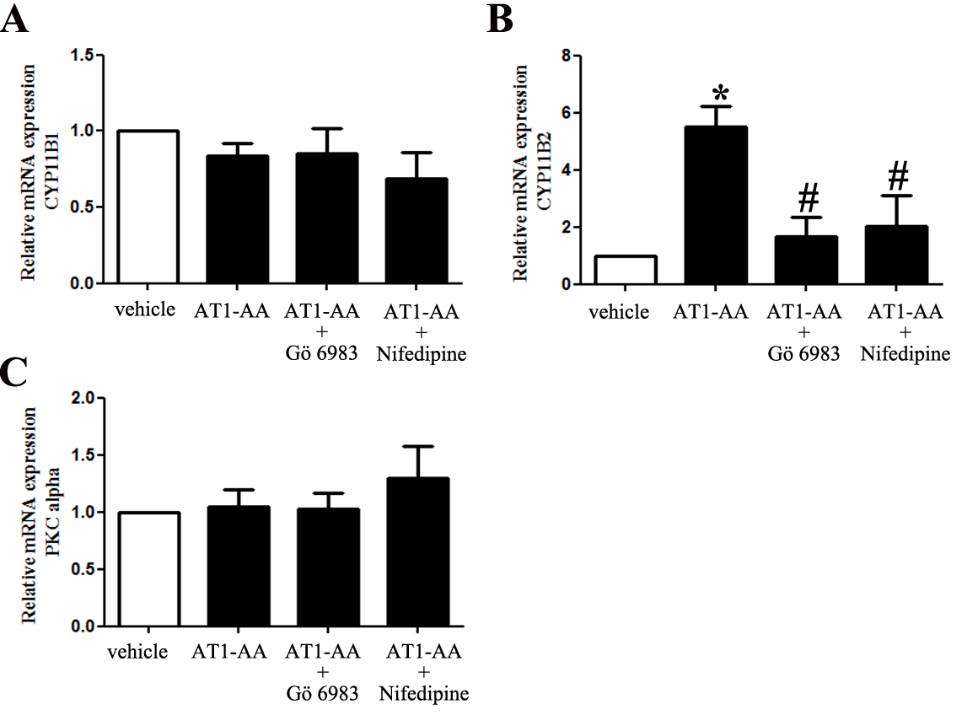

Supplement: MOESM1 [file 15230882]
